# Supplementary material for: The Role of Lipids in Allosteric Modulation of Dopamine D2 Receptor—In Silico Study
Source: Molecules. 2022 Feb 16;27(4):1335. doi: 10.3390/molecules27041335 (PMC8874991; doi:10.3390/molecules27041335)
Supplement: Supplementary file 1 [file molecules-27-01335-s001.zip › molecules-1555420-SI.pdf]

## Supporting Information

# The Role of Lipids in Allosteric Modulation of Dopamine D<sub>2</sub> Receptor—In Silico Study

Justyna Żuk <sup>1</sup>, Damian Bartuzi <sup>1</sup>, Przemysław Miszta <sup>2</sup> and Agnieszka A. Kaczor <sup>1,3,\*</sup>

<sup>1</sup> Department of Synthesis and Chemical Technology of Pharmaceutical Substances with Computer Modelling Laboratory, Faculty of Pharmacy, Medical University of Lublin, 4A Chodźki St., PL-20093 Lublin, Poland; j.siudem@gmail.com (J.Ż.); damian.bartuzi@umlub.pl (D.B.)

<sup>2</sup> Faculty of Chemistry, Biological and Chemical Research Centre, University of Warsaw, PL-02093 Warsaw, Poland; pmfenix@wp.pl

<sup>3</sup> School of Pharmacy, University of Eastern Finland, Yliopistonranta 1, P.O. Box 1627, FI-70211 Kuopio, Finland

\* Correspondence: agnieszka.kaczor@umlub.pl; Tel.: +48-81-448-72-73

Figures S1–S4

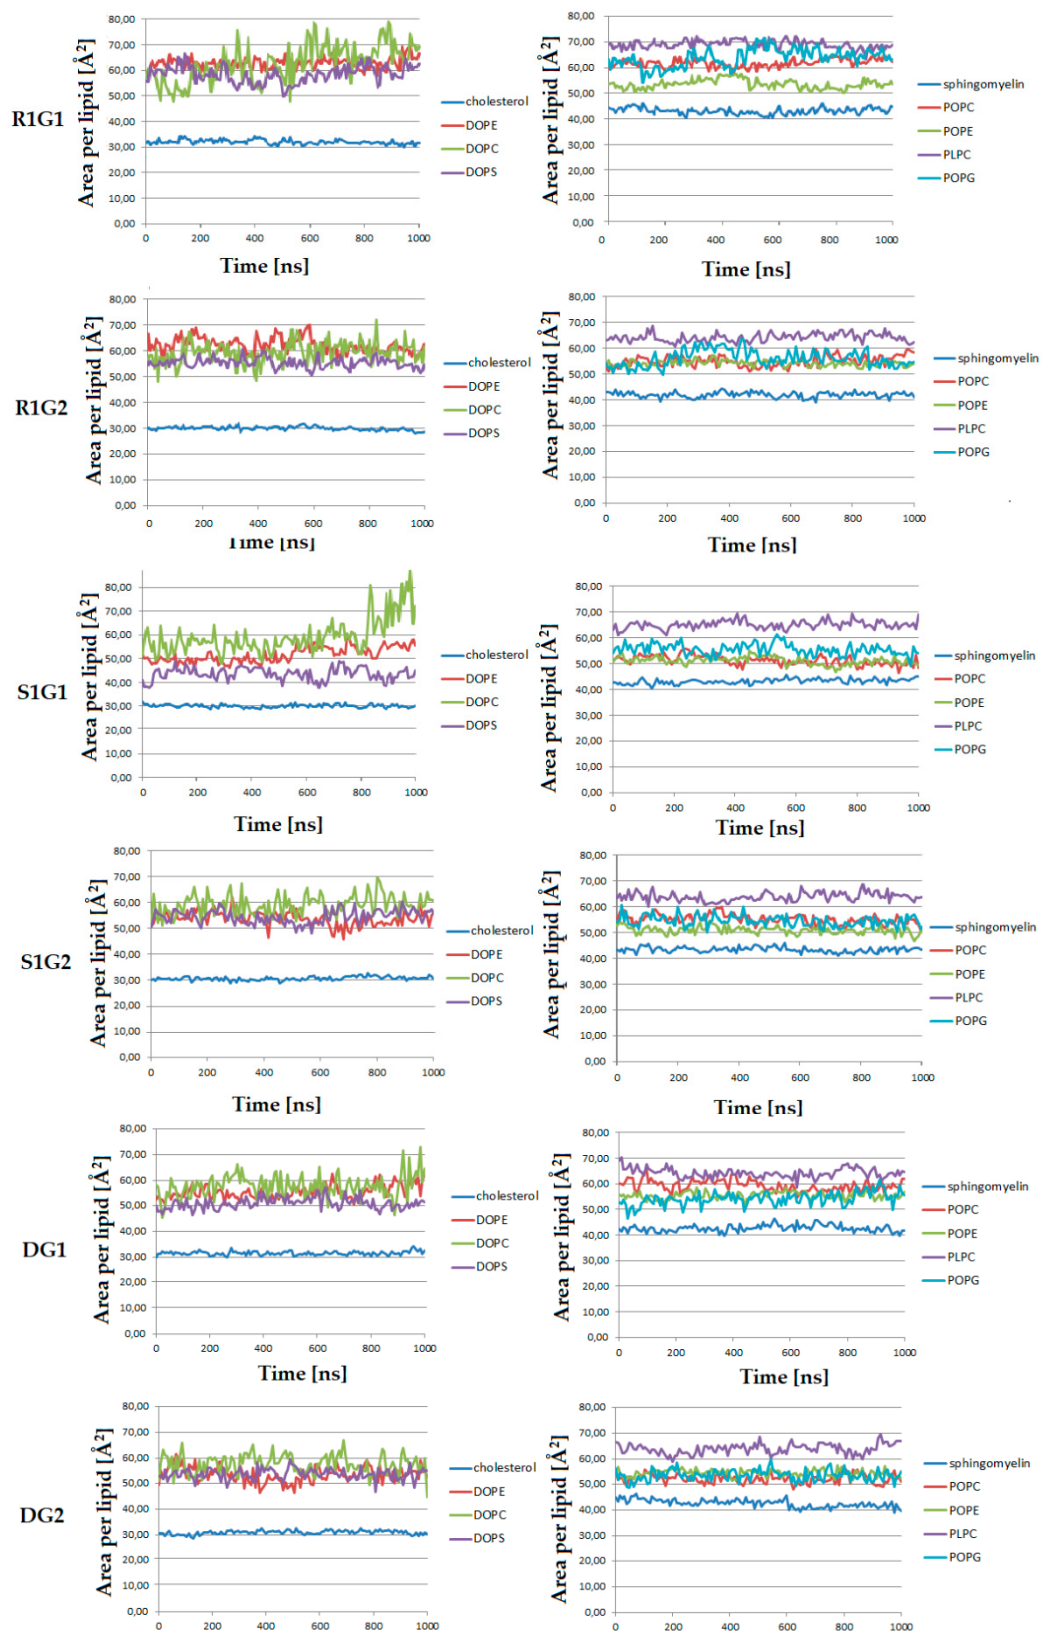

**Figure S1.** Area per lipid estimated for the R1G1, R1G2, S1G1, S1G2, DG1 and DG2 systems.

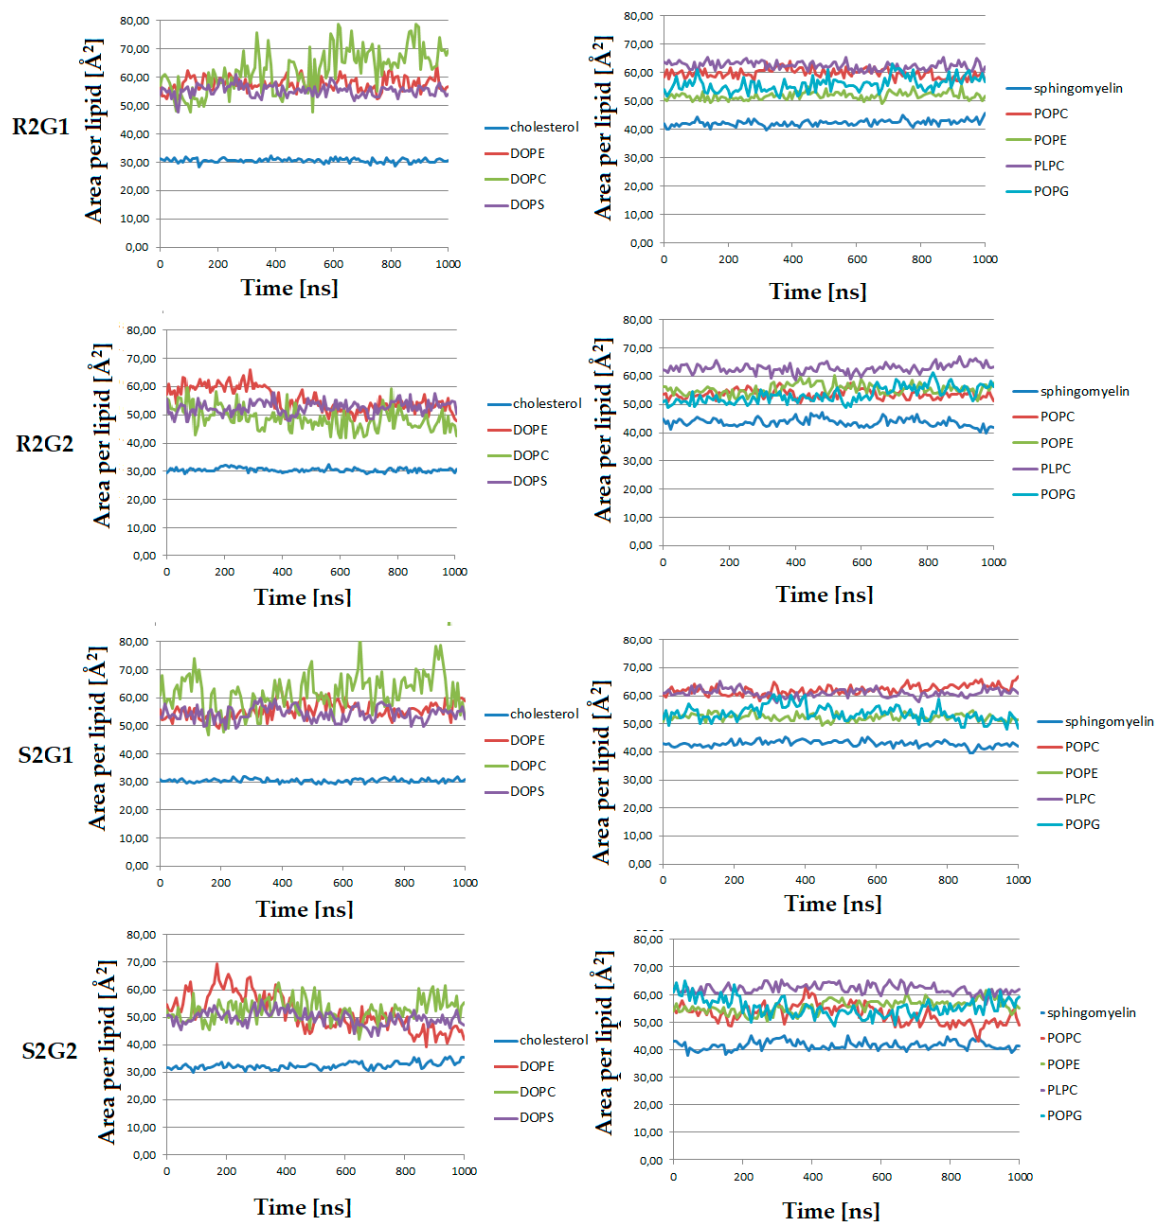

**Figure S2.** Area per lipid estimated for the R2G1, R2G2, S2G1 and S2G2 systems.

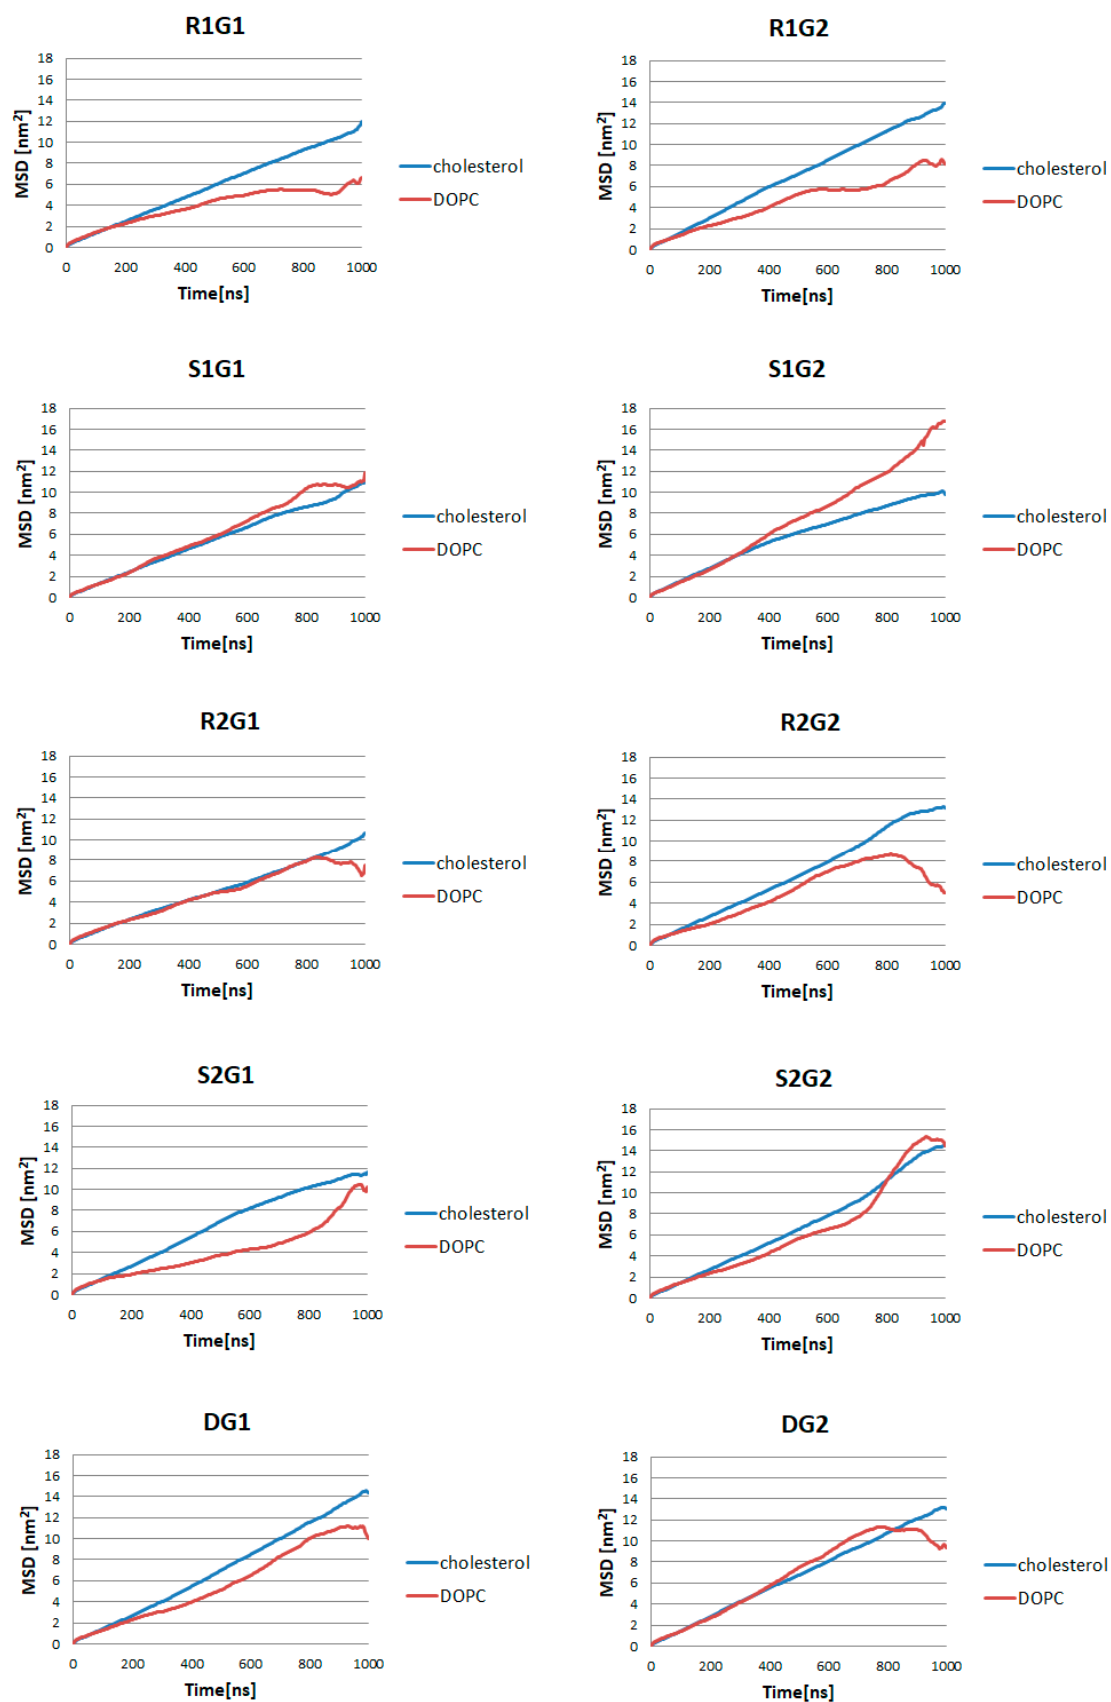

**Figure S3.** Mean-square displacement (MSD) curves of cholesterol and DOPC lipids for the R1G1, R1G2, S1G1, S1G2, R2G1, R2G2, S2G1, S2G2, DG1 and DG2 systems.

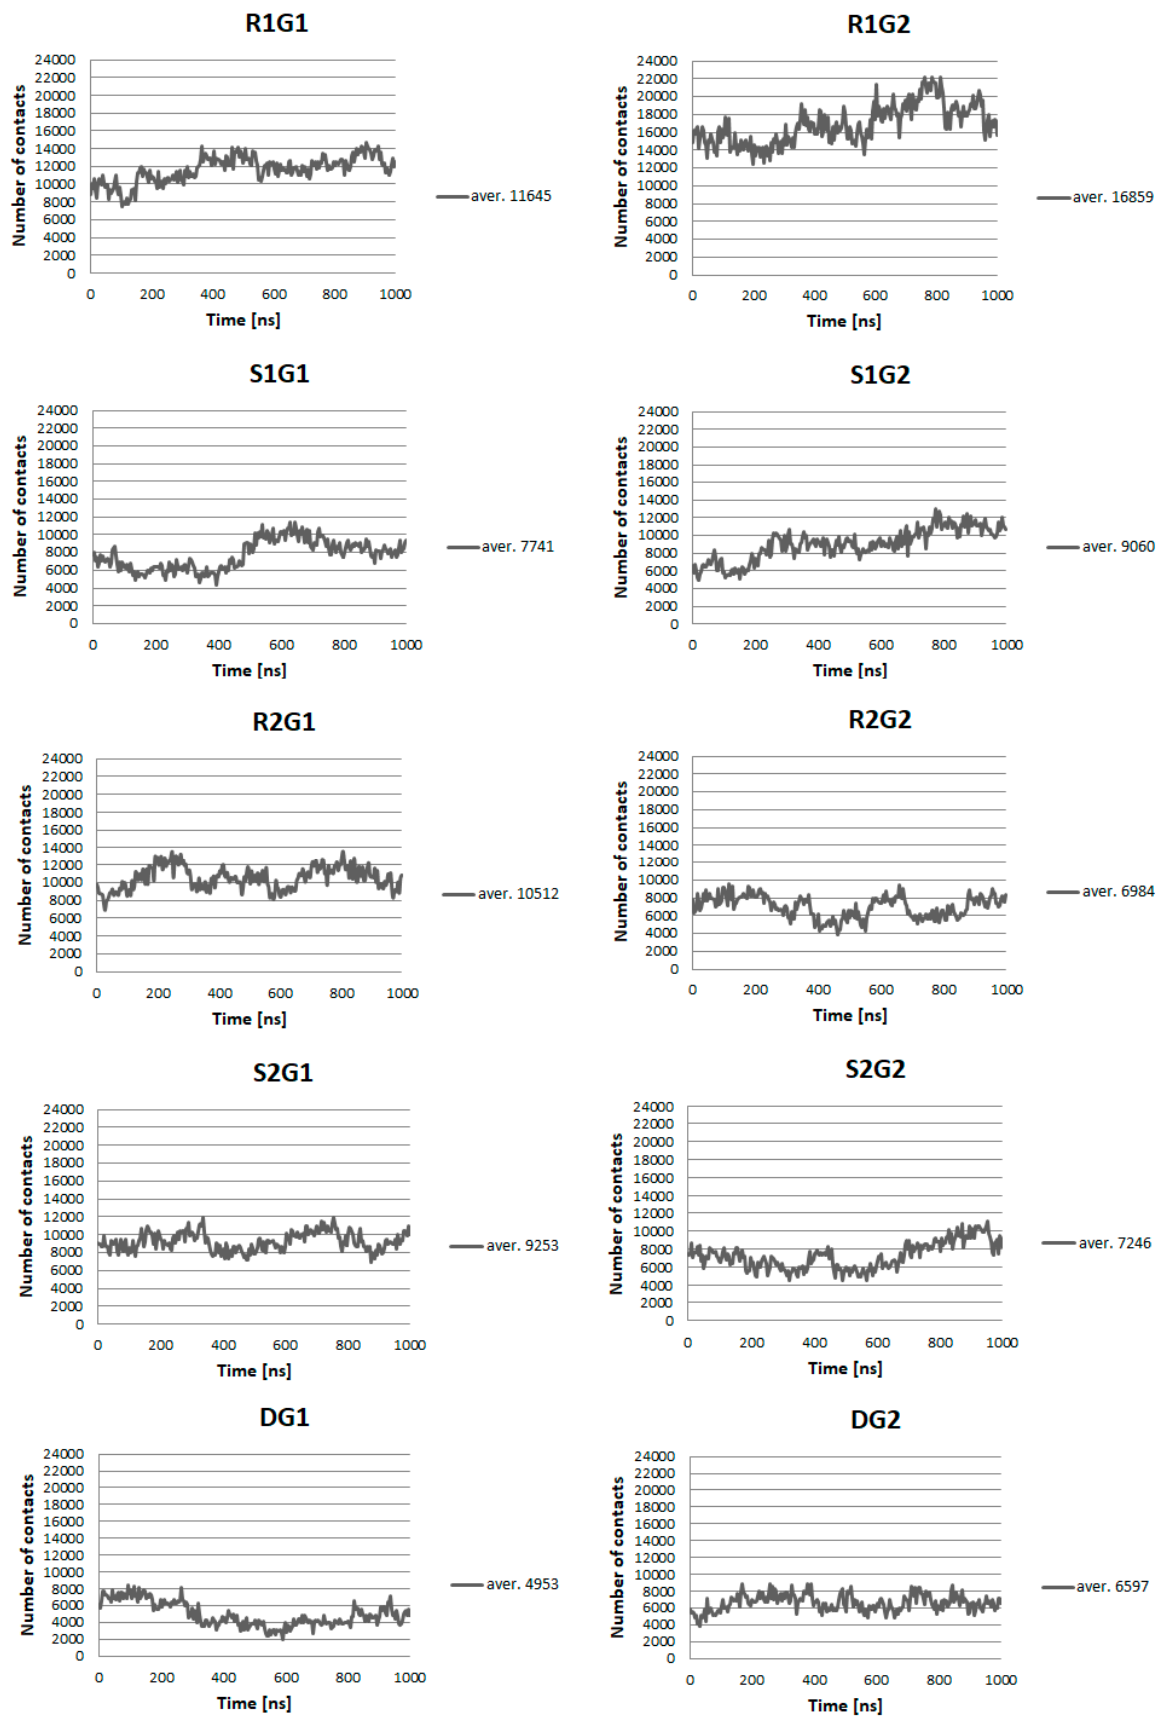

**Figure S4.** The time evolution of the number of contacts of cholesterol and protein within a given distance 0.6 nm in the R1G1, R1G2, S1G1, S1G2, R2G1, R2G2, S2G1, S2G2, DG1 and DG2 systems.
